# Supplementary material for: Microscopic Characterization of the Chloride Permeation Pathway in the Human Excitatory Amino Acid Transporter 1 (EAAT1)
Source: bioRxiv or medRxiv preprint supplement (doi:10.1101/2021.11.20.469345), 2021-11-20
Supplement: Supplementary file [file media-1.pdf]

## Supporting Information

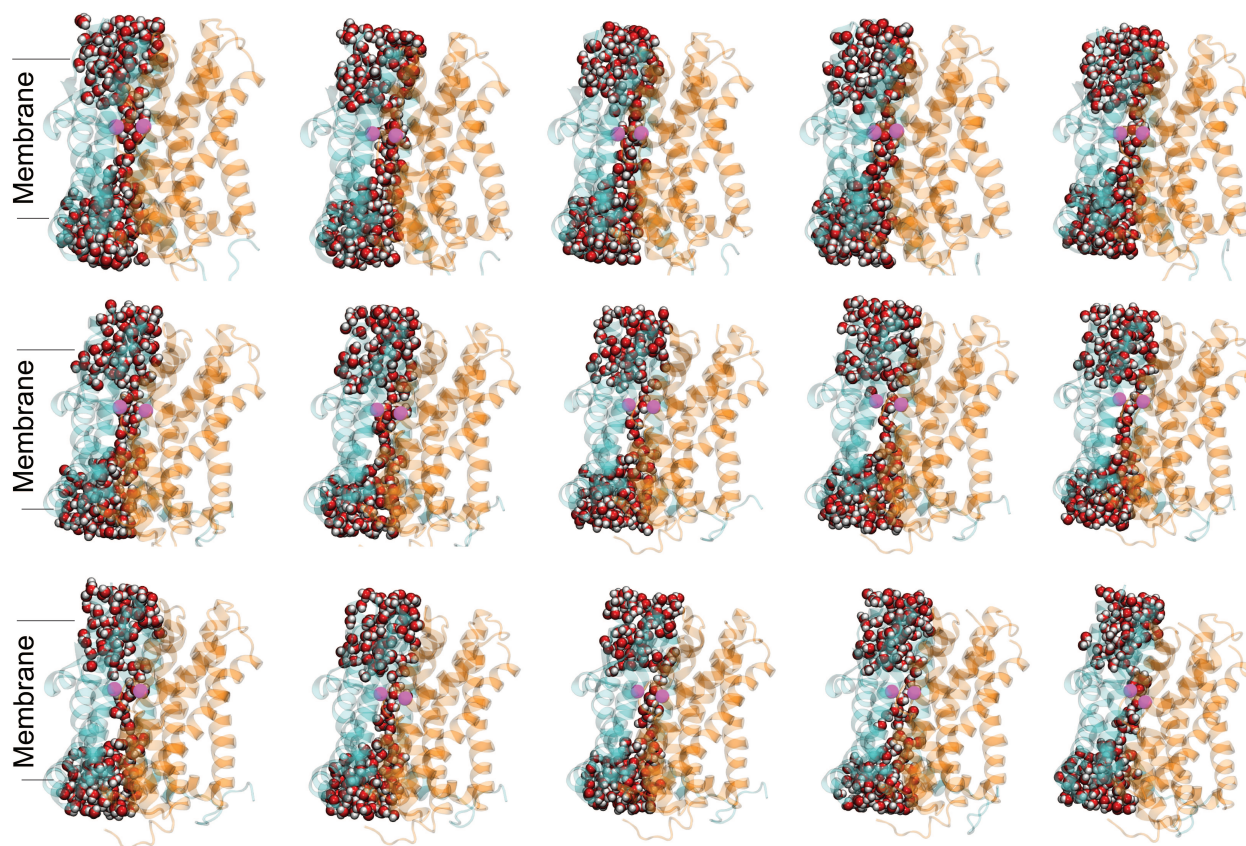

Figure S1: **Captured ClCS conformations in hEAAT1.** Using a WT-MetaD simulation, we captured 15 water-filled, and potentially  $\text{Cl}^-$  conducting, conformations. The transport and scaffold domains are shown in orange and cyan, respectively. Water molecules are shown in vDW, with oxygen atoms in red and hydrogens in white. The  $\text{C}\alpha$  atoms of key residues (L224/G349) crosslinked to trap the ClCS in GltPh in a previous study are shown in purple. Approximate location of upper and lower leaflet is shown in black lines.

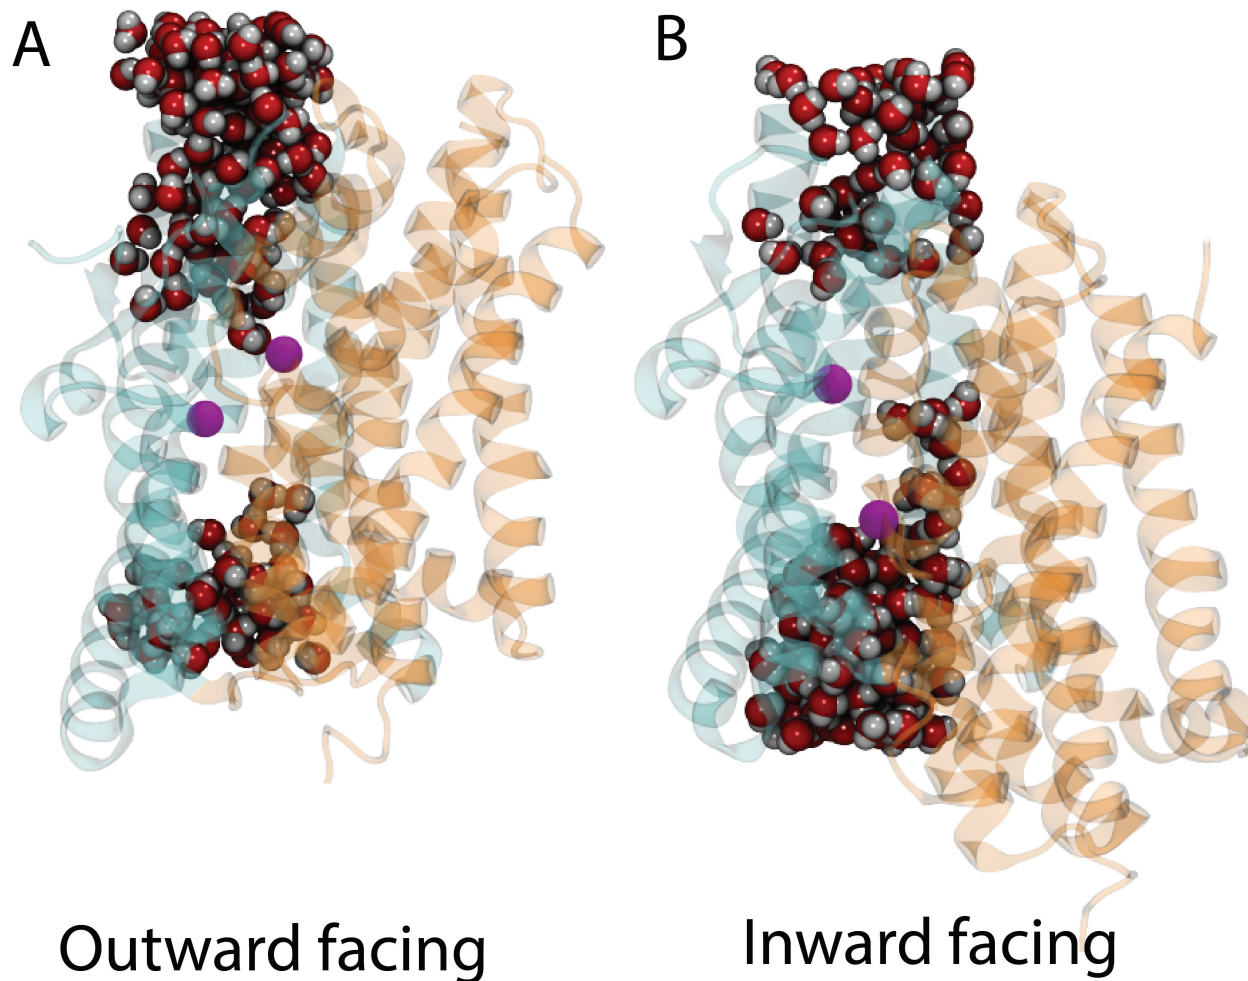

Figure S2: **Water discontinuity in OFS and IFS hEAAT1.** Snapshots highlighting luminal water occupancy of the hEAAT1 OFS (A) and IFS (B). The scaffold domain is shown in cyan and the transport domain in orange. The  $C\alpha$  atoms of the two residues cross-linked in an earlier study to trap the ClCS in  $\text{Glt}_{Ph}^{11}$  are shown in purple.

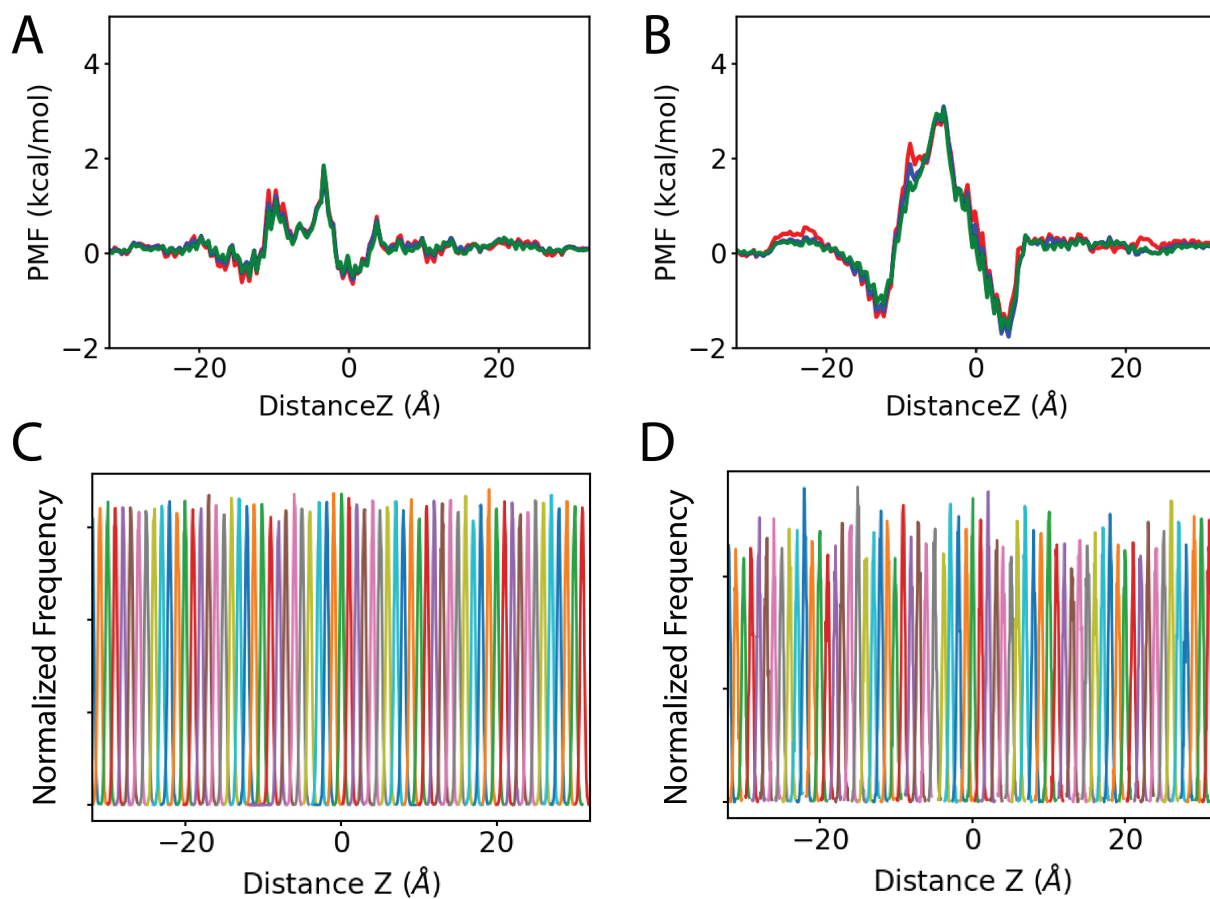

Figure S3: **Convergence of US simulations used to capture  $\text{Cl}^-$  and  $\text{Na}^+$  movements through hEAAT1-CICS.** Convergence of the free-energy profiles are shown for  $\text{Cl}^-$  (A) and  $\text{Na}^+$  (B) by comparing the PMF profiles obtained after 10 ns (red), 15 ns (blue), or 20 ns (green) of sampling each window. (C-D) Overlap between the corresponding windows in the US simulations for  $\text{Cl}^-$  (C) and  $\text{Na}^+$  (D) permeation through EAAT1-CICS.

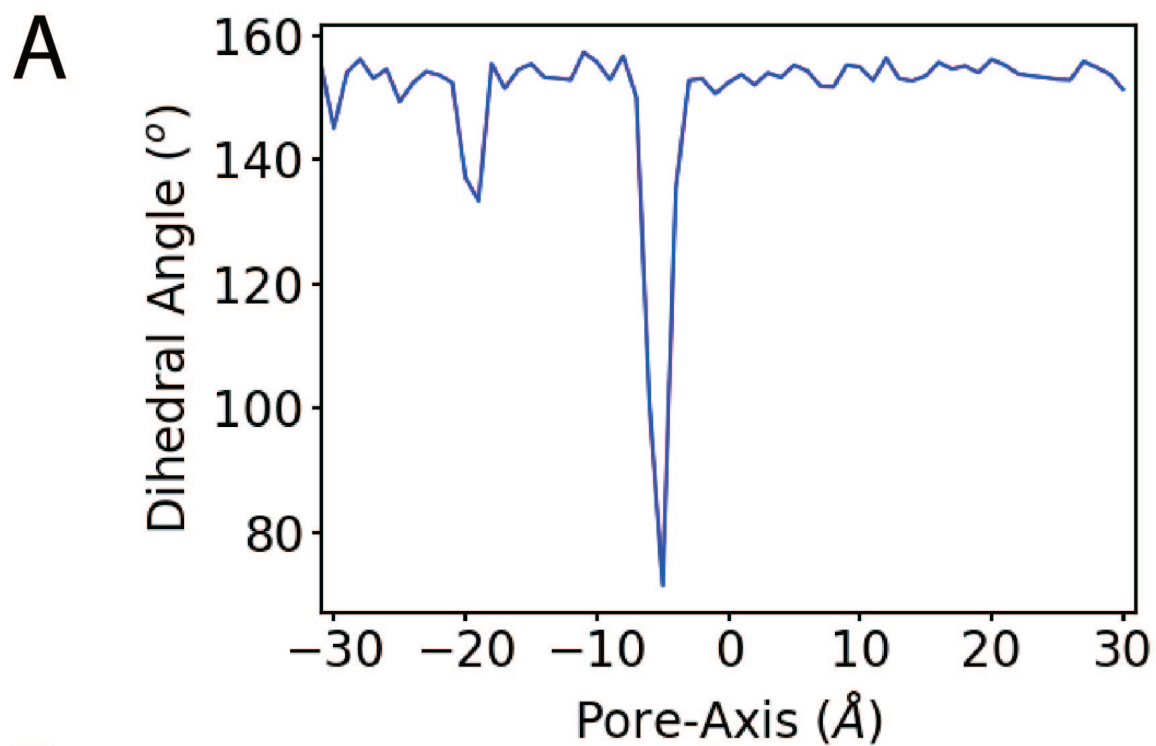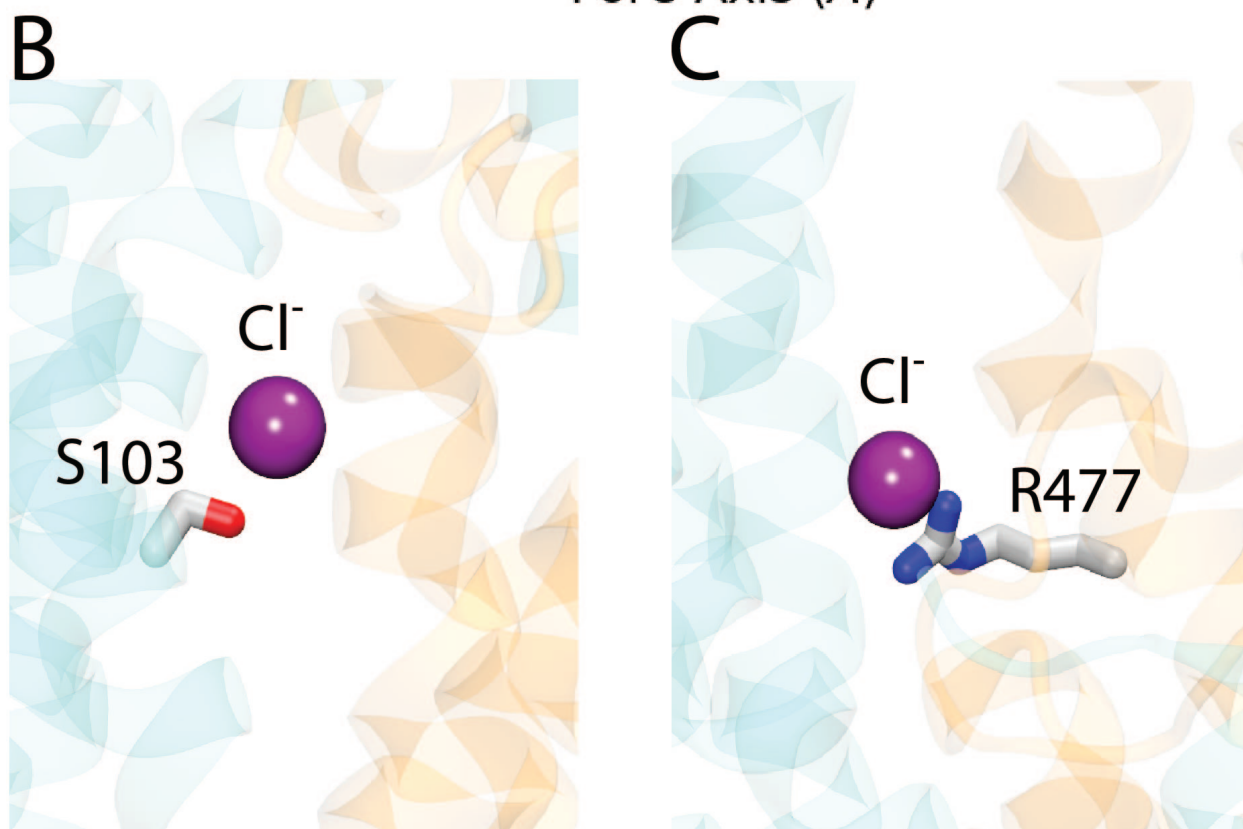

Figure S4: **Local conformational events during  $\text{Cl}^-$  permeation.** (A) The dihedral angle profile of M286 suggesting the re-orientation of this side chain accompanies movement of  $\text{Cl}^-$ . Closeup view of the interaction between  $\text{Cl}^-$  and (B) S103 and (C) R477.
